# Supplementary material for: Associations of Thyroid Hormones Profile During Normal Pregnancy and Postpartum With Anxiety, Depression, and Obsessive/Compulsive Disorder Scores in Euthyroid Women
Source: Frontiers journal article supplement (doi:10.3389/fnins.2021.663348), 2021-08-04
Supplement: Table_2.DOCX [file Table_2.DOCX]

Table 2. Significant correlations among hormonal and psychometric variables at the 2nd and 3rd trimesters and post-partum. GADI: Generalized Anxiety Disorder Inventory; PSWQ: Penn State Worry Questionnaire; STAI- S: State Anxiety Inventory; STAI- T: Trait Anxiety Inventory; EPDS: Edinburgh Postnatal Depression Scale; BLUES: Stein’s Maternal Blues Scale; BDI: Beck Depression Inventory. Y-BOCS: Yale- Brown Obsessive Compulsive Scale.

|  | **2nd trimester** | | | **3rd trimester** | | | **Postpartum** | | |
| --- | --- | --- | --- | --- | --- | --- | --- | --- | --- |
| **FT3** | **FT4** | **TSH** | **rT3** | **FT4** | **TSH** | **rT3** | **TSH** | **anti-TPO** |
| **GADI** | r=-0.545  p<0.010 | r=-0.768  p<0.010 | r=0.837  p<0.05 |  | r=-0.468  p=0.018 | r=0.435  p=0.015 |  |  |  |
| **PSWQ** |  | r=-0.384  p<0.010 |  |  |  |  | r=0.478  p=0.024 |  |  |
| **STAI-S** |  |  |  |  |  | r=0.409  p=0.024 |  |  |  |
| **STAI-T** |  |  |  |  |  |  | r=0.527  p=0.014 |  |  |
| **EPDS** |  | r=-0.364  p<0.050 |  |  | r=-0.39  p=0.036 |  | r=0.44  p=0.046 |  |  |
| **BLUES** |  |  |  | r= 0.89  p=0.000 |  |  |  |  | r=0.586  p=0.070 |
| **BDI** |  |  |  |  |  |  | r=0.556  p=0.021 |  |  |
| **Y-BOCS** |  | r= -0.544  p<0.010 |  |  | r=-0.625  p=0.001 | r=0.389  p=0.041 |  | r=0.43  p=0.045 |  |

**Abbreviations : GADI**: Generalized Anxiety Disorder Inventory ;**PSWQ**: Penn State Worry Questionnaire;

**STAI- S**: State Anxiety Inventory; **STAI- T**: Trait Anxiety Inventory;

**EPDS**: Edinburgh Postnatal Depression Scale; **BLUES**: Stein’s Maternal Blues Scale;

**BDI**: Beck Depression Inventory; **Y-BOCS**: Yale- Brown Obsessive Compulsive Scale
