# Supplementary material for: Associations of Thyroid Hormones Profile During Normal Pregnancy and Postpartum With Anxiety, Depression, and Obsessive/Compulsive Disorder Scores in Euthyroid Women
Source: Frontiers journal article supplement (doi:10.3389/fnins.2021.663348), 2021-08-04
Supplement: Table_3.DOCX [file Table_3.DOCX]

Table 3. Results from longitudinal bivariate models for GADI, EPDS, and YBOCS as dependent variables with time, TSH, and FT4 as independent variables. * = p<.05, ** = p<.01, ***=p<.001. GADI: Generalized Anxiety Disorder Inventory; PSWQ: Penn State Worry Questionnaire; STAI- S: State Anxiety Inventory; STAI- T: Trait Anxiety Inventory; EPDS: Edinburgh Postnatal Depression Scale; BLUES: Stein’s Maternal Blues Scale; BDI: Beck Depression Inventory. Y-BOCS: Yale- Brown Obsessive Compulsive Scale.

|  | **Coef.** | **SE** | **t** | **95%CI** |
| --- | --- | --- | --- | --- |
|  | **Dependent Variable = GADI** | | | |
| TSH | 4.303 | 1.508 | **2.853**** | 1.30 ― 7.31 |
| FT4 | -1.211 | 0.176 | **-6.862***** | -1.56 ― -0.86 |
|  | **Dependent Variable = EPDS** | | | |
| TSH | 1.598 | 0.829 | 1.928 | -0.059 ― 3.255 |
| FT4 | -0.248 | 0.112 | **-2.219*** | -0.472 ― -0.024 |
|  | **Dependent Variable = YBOCS** | | | |
| TSH | 1.292 | 0.532 | **2.428*** | 0.217 ― 2.366 |
| FT4 | -0.301 | 0.066 | **-4.545***** | -0.436 ― -0.165 |

.
